# Supplementary material
Source: publisher figshare collection journal article supplement (https://sage.figshare.com/ndownloader/files/14862182)
Supplement: Supplementary file 1 [file 14862182]

Table for Online Supplement

*Rotated Factor Loadings from Principal Component Analysis with Varimax Rotation (Study 2).*

*How much did each of the following reasons*

*motivate you to participate in the Women’s March?*  *Factor 1 Factor 2*

Advocating for racial justice and equality .85 .18

Preserving the rights of immigrants and refugees .88 .07

Expressing concern about recent increases in hate crimes .74 .13

Protecting women’s bodies from assault and harassment .20 .80

Advocating for wage equality between men and women .28 .69

Protecting a woman’s right to choose (abortion rights) -.06 .78

Eigenvalue 2.63 1.33

Percent of Variance Accounted For 43.78% 22.19%
